# Supplementary material for: Na2GaS2Cl: a new sodium-rich chalcohalide with two-dimensional [GaS2]∞ layers and wide interlayer space
Source: Royal Society of Chemistry journal article supplement (doi:10.1039/d1dt01099a), 2021-01-01
Supplement: d1dt01099a1.pdf [file d1dt01099a1.pdf]

## Electronic Supplementary Information (ESI)

# **Na<sub>2</sub>GaS<sub>2</sub>Cl: A New Sodium-Rich Chalcogenide with Two-Dimensional [GaS<sub>2</sub>]<sub>∞</sub> Layers and Wide Interlayer Space**

**Xiaoshuang Li<sup>a\*</sup>, Fei Liang<sup>c</sup>, Tianpeng Liu<sup>a</sup> and Haifeng Li<sup>b\*</sup>**

*<sup>a</sup>School of Applied Physics and Materials, Wuyi University, Jiangmen, Guangdong 529020, P.R. China. Email: [lixiaoshuang12@mails.ucas.ac.cn](mailto:lixiaoshuang12@mails.ucas.ac.cn)*

*<sup>b</sup>Joint Key Laboratory of the Ministry of Education, Institute of Applied Physics and Materials Engineering, University of Macau, Avenida da Universidade, Taipa, Macau SAR, 999078 China. Email: [haifengli@um.edu.mo](mailto:haifengli@um.edu.mo)*

*<sup>c</sup>Institute of Materials Science, TU Darmstadt, 64287 Darmstadt, Germany*

†Electronic supplementary information (ESI) available: Coordination environments of all cations, atomic coordinates, isotropic displacement parameters. CCDC 2073426. For ESI and crystallographic data in CIF or other electronic format see DOI: XXX.

## 1. Tables and Figures

**Table S1.** Fractional atomic coordinates, equivalent isotropic displacement parameters, and bond valence sums (BVS) for  $\text{Na}_2\text{GaS}_2\text{Cl}$ .  $U_{\text{eq}}$  is defined as 1/3 of the trace of the orthogonalized  $U_{ij}$  tensor.

**Figure S1.** The thermal vibration ellipsoids of all atoms in  $\text{Na}_2\text{GaS}_2\text{Cl}$ .

**Figure S2.** Coordination environments of all cations in  $\text{Na}_2\text{GaS}_2\text{Cl}$ .

**Figure S3.** (a) Band structure of  $\text{NaGaS}_2$ . (b) The total and partial density of states (DOS and PDOS, respectively) of  $\text{NaGaS}_2$ . Dashed line represents the Fermi energy ( $E_f$ ).

**Table S1.** Fractional atomic coordinates, equivalent isotropic displacement parameters, and bond valence sums (BVS) for Na<sub>2</sub>GaS<sub>2</sub>Cl.  $U_{eq}$  is defined as 1/3 of of the trace of the orthogonalized  $U_{ij}$  tensor.

| Atom | Wyck. | S.O.F. | $x/a$       | $y/b$       | $z/c$       | $U_{eq}$ [Å <sup>2</sup> ] | BVS    |
|------|-------|--------|-------------|-------------|-------------|----------------------------|--------|
| Na1  | 4a    | 1      | 1/2         | 1/2         | 1/2         | 0.0161(11)                 | 1.072  |
| Na2  | 4c    | 1      | 1/2         | 0.16772(13) | 1/4         | 0.0205(12)                 | 0.972  |
| Na3  | 4c    | 1      | 1/2         | 0.16675(16) | 3/4         | 0.0277(14)                 | 0.894  |
| Na4  | 4c    | 1      | 1.00000     | 0.41771(14) | 3/4         | 0.0211(12)                 | 0.948  |
| Na5  | 4c    | 1      | 1/2         | 0.41675(14) | 3/4         | 0.0224(12)                 | 0.890  |
| Na6  | 4b    | 1      | 1.00000     | 1/2         | 1.00000     | 0.0131(10)                 | 1.052  |
| Na7  | 8g    | 1      | 0.2486(5)   | 0.24980(8)  | 1/4         | 0.0166(9)                  | 1.010  |
| Ga1  | 8f    | 1      | 1/2         | 0.34152(2)  | 0.49611(11) | 0.0093(3)                  | 2.985  |
| Ga2  | 8g    | 1      | 0.74645(10) | 0.40851(2)  | 1/4         | 0.0083(3)                  | 2.917  |
| S1   | 4c    | 1      | 1/2         | 0.30624(7)  | 1/4         | 0.0110(6)                  | -1.940 |
| S2   | 4c    | 1      | 1/2         | 0.30793(8)  | 3/4         | 0.0132(6)                  | -1.890 |
| S3   | 16h   | 1      | 0.75619(17) | 0.37464(6)  | 0.50611(17) | 0.0112(3)                  | -1.854 |
| S4   | 4c    | 1      | 1.00000     | 0.44265(7)  | 1/4         | 0.0101(6)                  | -1.854 |
| S5   | 4c    | 1      | 1/2         | 0.44337(8)  | 1/4         | 0.0105(6)                  | -1.976 |
| Cl1  | 8f    | 1      | 1/2         | 0.22045(5)  | 0.5000(3)   | 0.0128(4)                  | -1.023 |
| Cl2  | 8g    | 1      | 0.7502(3)   | 0.47044(5)  | 3/4         | 0.0117(4)                  | -1.020 |

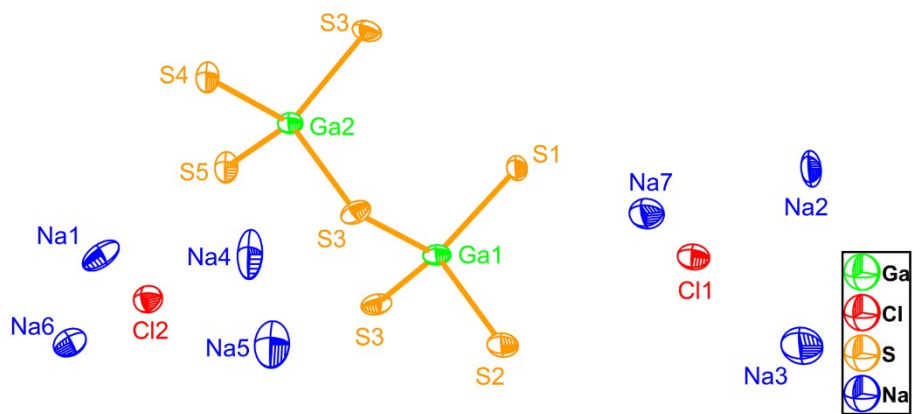

**Figure S1.** The thermal vibration ellipsoids of all atoms in Na<sub>2</sub>GaS<sub>2</sub>Cl.

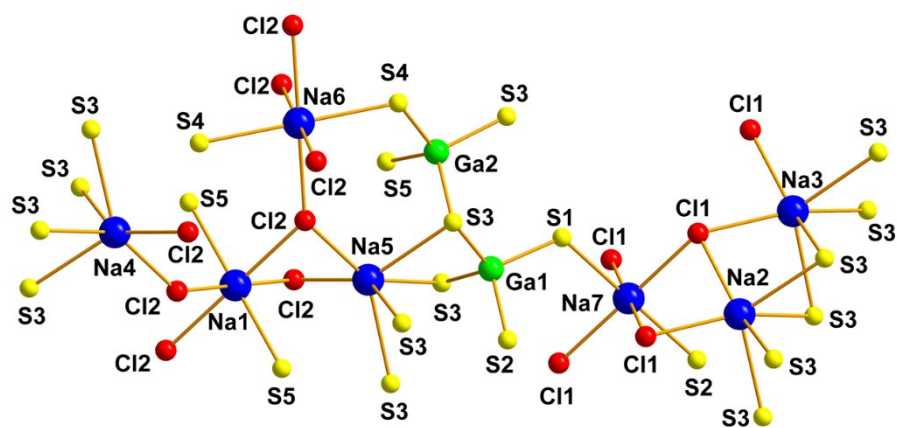

**Figure S2.** Coordination environments of all cations in Na<sub>2</sub>GaS<sub>2</sub>Cl.

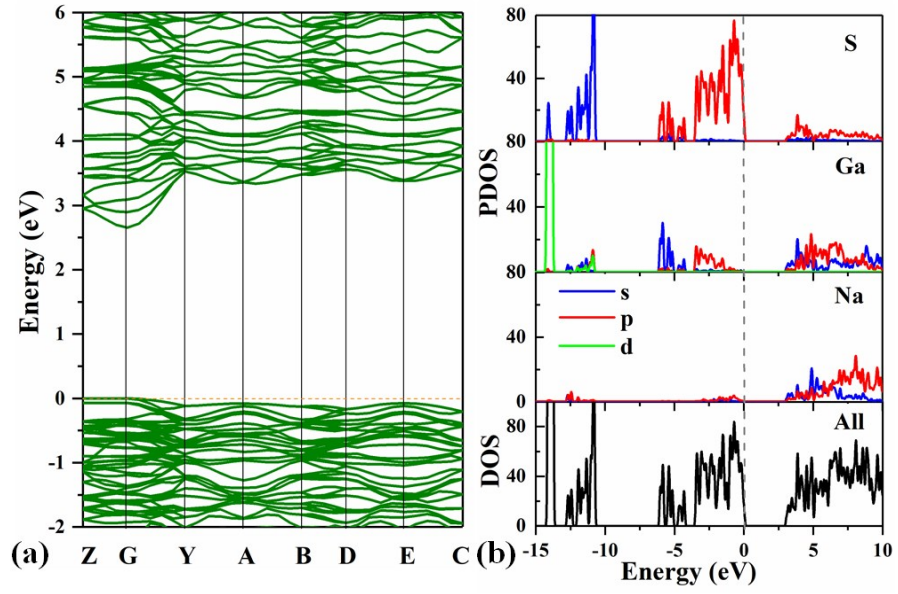

**Figure S3.** (a) Band structure of NaGaS<sub>2</sub>. (b) The total and partial density of states (DOS and PDOS, respectively) of NaGaS<sub>2</sub>. Dashed line represents the Fermi energy ( $E_f$ ).
